# Supplementary material for: Gold nanoparticles prepared with a room-temperature ionic liquid–radiation irradiation method
Source: Royal Society of Chemistry journal article supplement (doi:10.1039/b914759d), 2009-01-01
Supplement: b914759d.pdf [file b914759d.pdf]

Electronic supplementary information (ESI) for Chemical Communications

## Gold Nanoparticles Prepared with a Room-Temperature Ionic Liquid–Radiation Irradiation Method

Tetsuya Tsuda,<sup>a,b</sup> Satoshi Seino,<sup>a</sup> and Susumu Kuwabata<sup>b,c</sup>

<sup>a</sup>Frontier Research Base for Global Young Researchers,

Graduate School of Engineering, Osaka University, 2-1 Yamada-oka, Suita, Osaka 565-0871, Japan

<sup>b</sup>Department of Applied Chemistry,

Graduate School of Engineering, Osaka University, 2-1 Yamada-oka, Suita, Osaka 565-0871, Japan

<sup>c</sup>Japan Science and Technology Agency, CREST, Kawaguchi, Saitama 332-0012, Japan

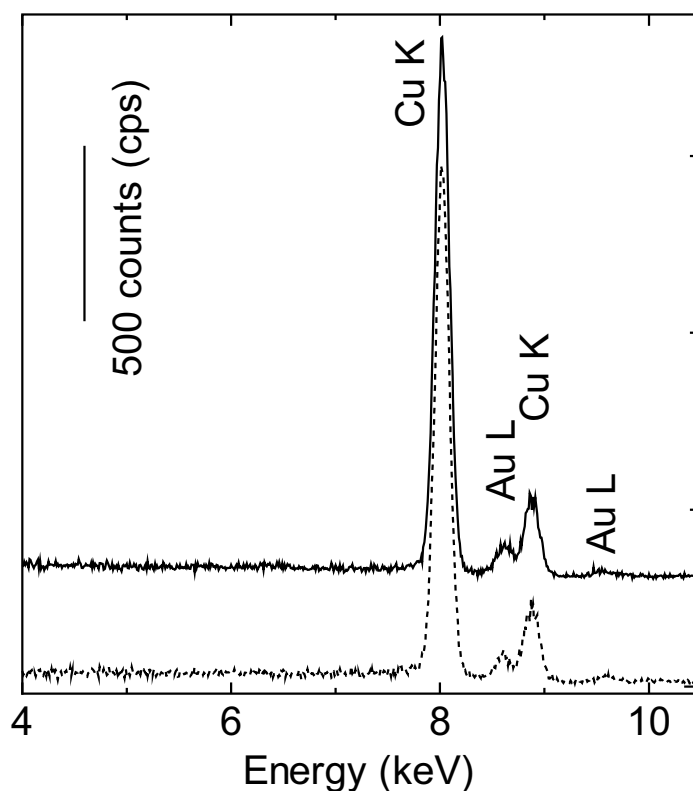

Figure S1 EDX spectra of Au nanoparticles synthesized in BuMeImTf<sub>2</sub>N with 0.5 mmol L<sup>-1</sup> NaAuCl<sub>4</sub>•2H<sub>2</sub>O using (—) accelerator electron beam and (- - -)  $\gamma$ -ray irradiation. Copper mesh grids were used for the EDX analyses. The irradiation dose was 20 kGy.

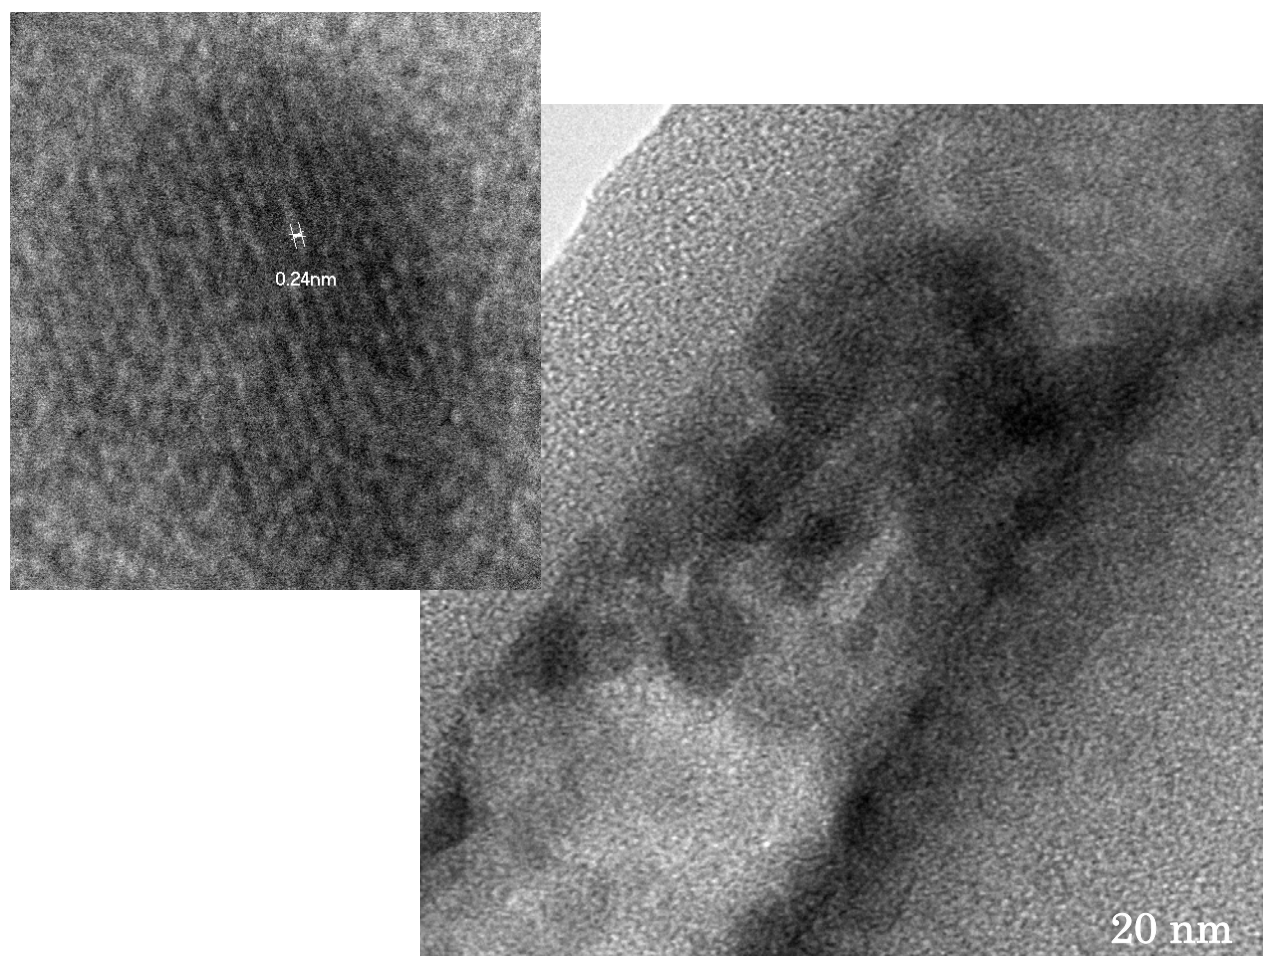

Figure S2 TEM images of Au nanoparticles synthesized in BuMeImTf<sub>2</sub>N with 0.5 mmol L<sup>-1</sup> NaAuCl<sub>4</sub>•2H<sub>2</sub>O using  $\gamma$ -ray irradiation dose of 20 kGy.
